# Supplementary material
Source: publisher site journal article supplement (https://www.dovepress.com/article/350913)
Supplement: Supplementary file 1 [file get_supplementary_file.php]

# Supplementary Figure S1

## HeLa

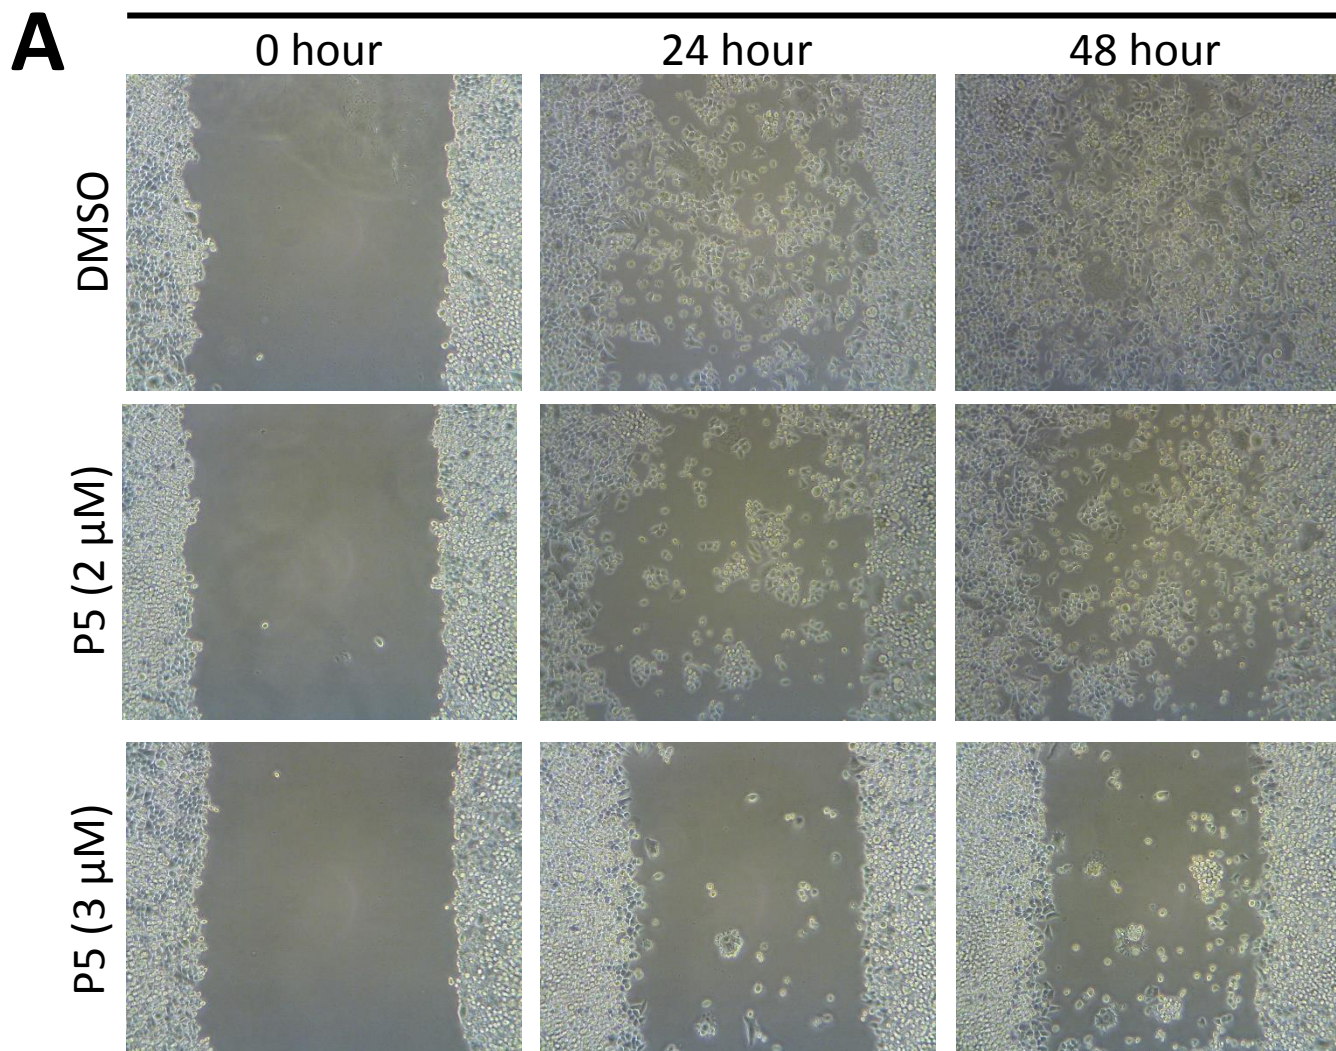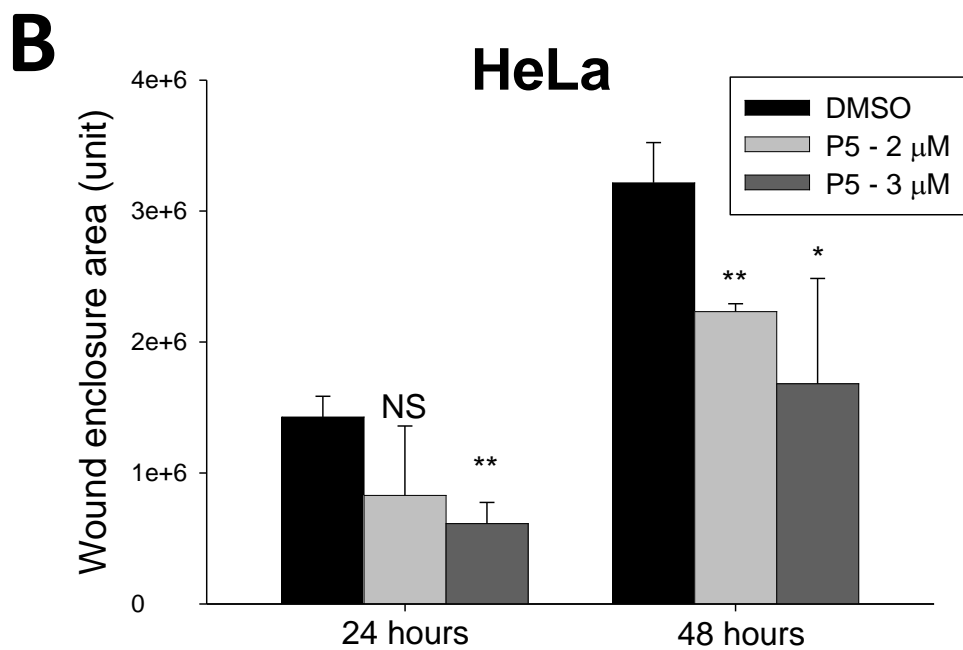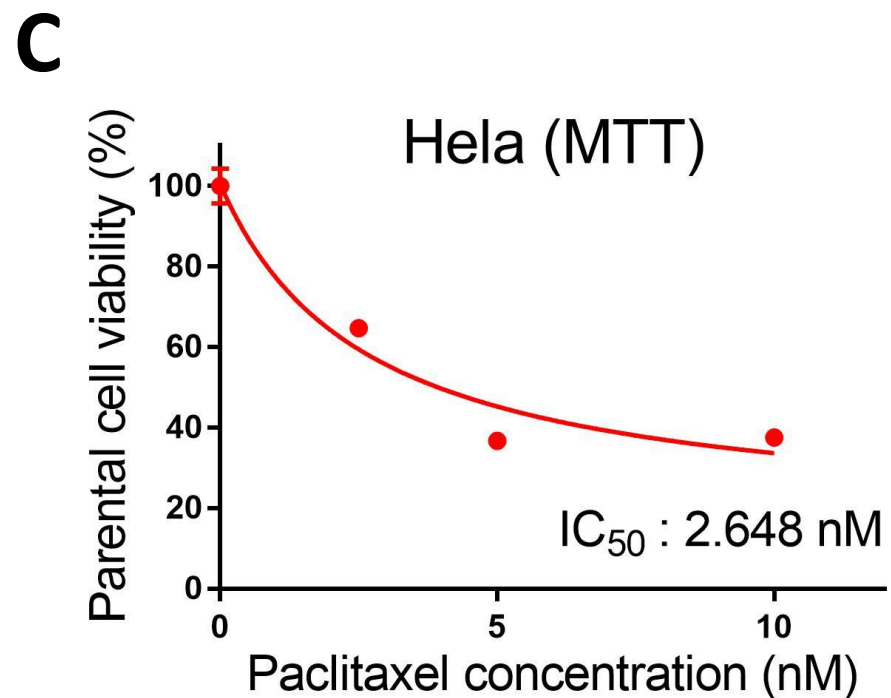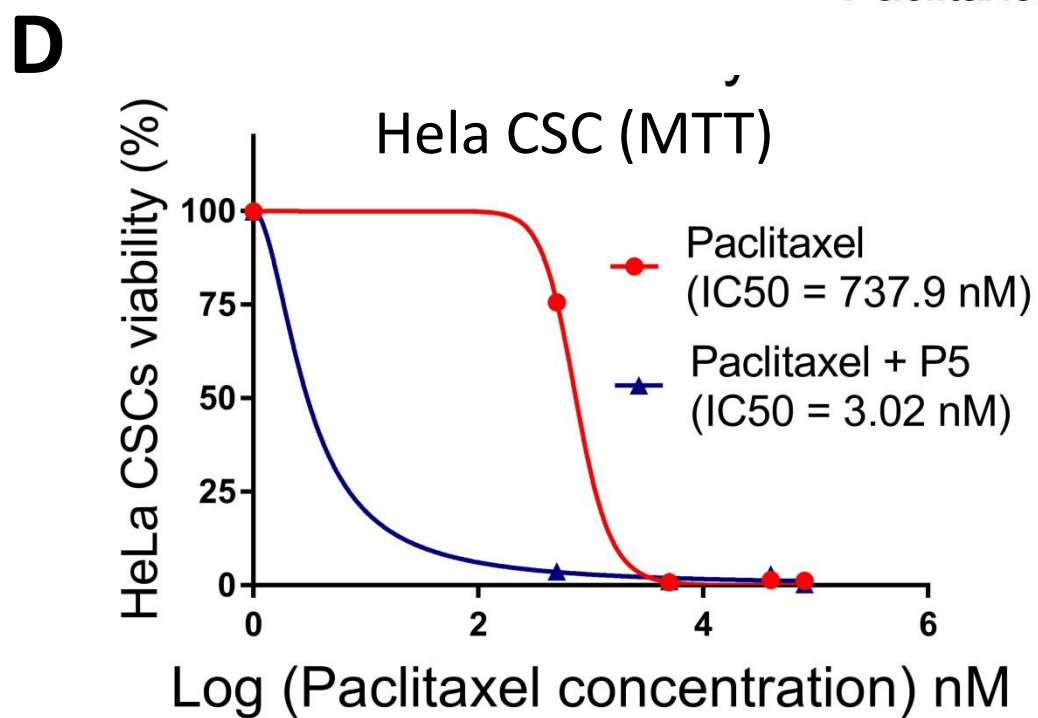

# Supplementary Figure S2

## A

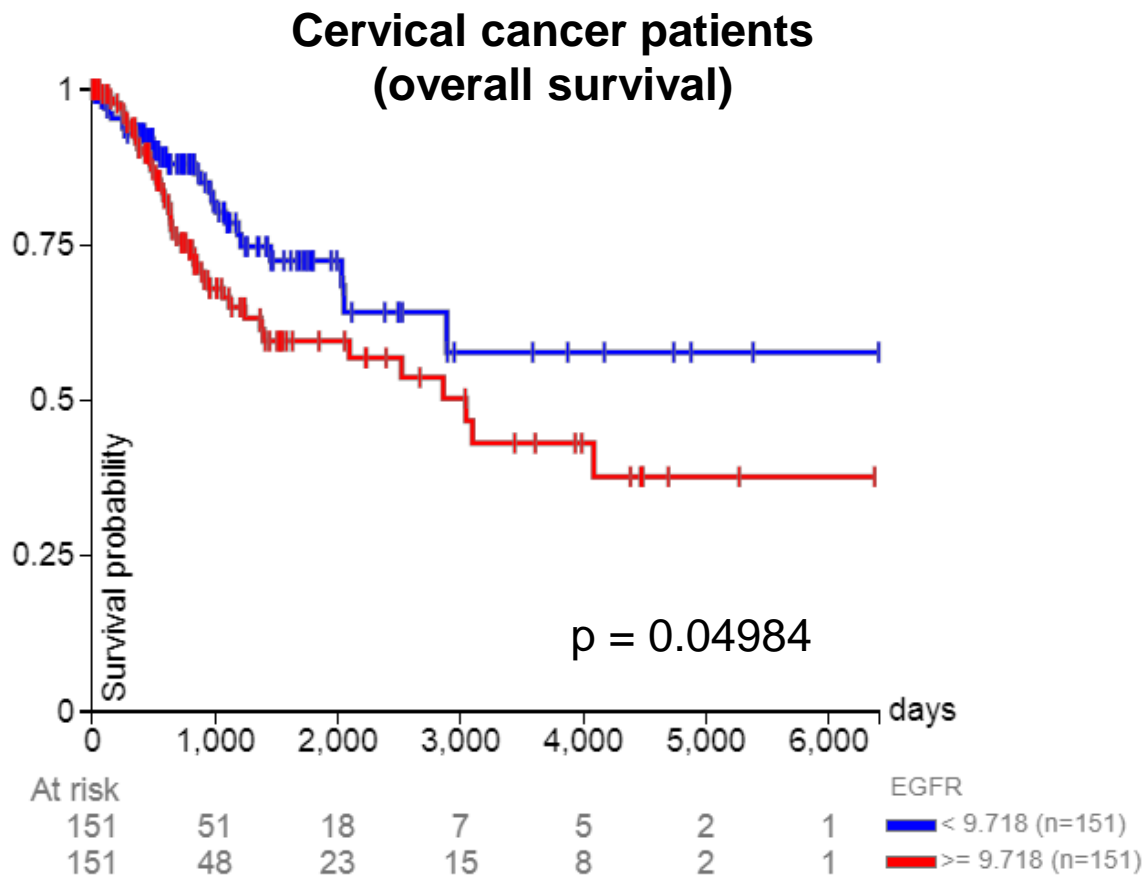

## B

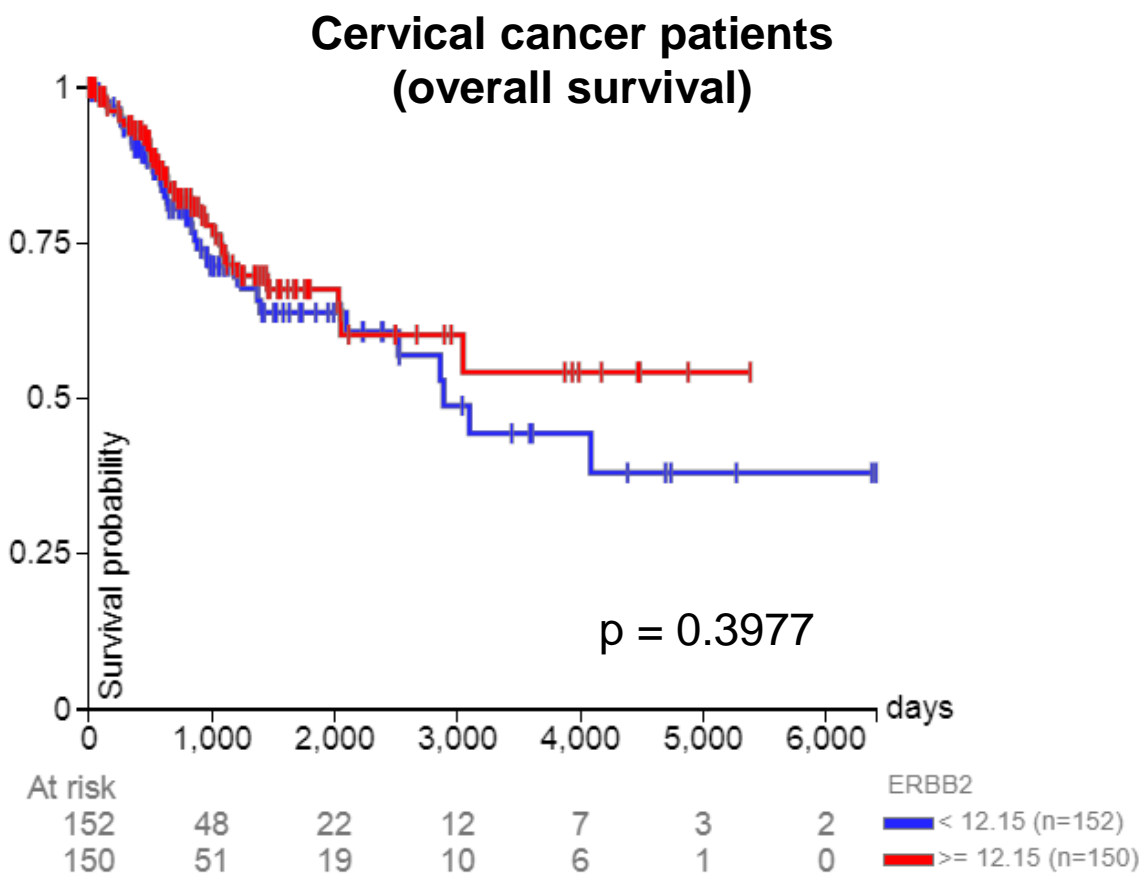

### Supplementary Figure S1

(A) The wound healing assay shows the N-phenyl pyrazoline 5 treatment significantly reduced the migration ability in HeLa cells with the doses 2  $\mu$ M and 3  $\mu$ M. (B) The quantification graph of the previous figure. (C) To evaluate the cancer stem cell characteristic (chemoresistant), the MTT assays were performed using the HeLa parental cells and harvested HeLa cells from hanging drop 3D culture. The parental cells show the  $IC_{50}$  was 2.648 nM against paclitaxel. (D) The harvested HeLa cells from hanging drop 3D culture were more resistant to paclitaxel with  $IC_{50}$  737.9 nM. Intriguingly, the N-phenyl pyrazoline 5 treatment sensitized the resistant HeLa cells to paclitaxel. \* p-value < 0.05, \*\* p < 0.01, \*\*\* p < 0.001; **NS**, not significant.

### Supplementary Figure S2

The Kaplan Meier overall survival analysis was performed using the cervical cancer patients dataset (<https://xenabrowser.net/>).

(A) The EGFR high expression was significantly associated with poor survival of cervical cancer patients, (B) meanwhile, the ERBB2 has no prognostic value in cervical cancer patients.
